# Supplementary material for: SARS-CoV-2 RNA Extraction Using Magnetic Beads for Rapid Large-Scale Testing by RT-qPCR and RT-LAMP
Source: Viruses. 2020 Aug 7;12(8):863. doi: 10.3390/v12080863 (PMC7472728; doi:10.3390/v12080863)
Supplement: Supplementary file 1 [file viruses-12-00863-s001.pdf]

# SARS-CoV-2 RNA Extraction Using Magnetic Beads for Rapid Large-Scale Testing by RT-qPCR and RT-LAMP

Steffen Klein <sup>1,2,†</sup>, Thorsten G. Müller <sup>1,†</sup>, Dina Khalid <sup>1</sup>, Vera Sonntag-Buck <sup>1</sup>, Anke-Mareil Heuser <sup>1</sup>, Bärbel Glass <sup>1</sup>, Matthias Meurer <sup>3,4</sup>, Ivonne Morales <sup>5</sup>, Angelika Schillak <sup>1</sup>, Andrew Freistaedter <sup>1</sup>, Ina Ambiel <sup>1</sup>, Sophie L. Winter <sup>1,2</sup>, Liv Zimmermann <sup>1</sup>, Tamara Naumoska <sup>1</sup>, Felix Bubeck <sup>1</sup>, Daniel Kirrmaier <sup>3,4</sup>, Stephanie Ullrich <sup>1</sup>, Isabel Barreto Miranda <sup>1</sup>, Simon Anders <sup>3</sup>, Dirk Grimm <sup>1,6</sup>, Paul Schnitzler <sup>1</sup>, Michael Knop <sup>3,4,7</sup>, Hans-Georg Kräusslich <sup>1,6</sup>, Viet Loan Dao Thi <sup>1,2</sup>, Kathleen Börner <sup>1,6,\*</sup>, and Petr Chlanda <sup>1,2,\*</sup>

† Equal contribution.

\* Correspondence: petr.chlanda@bioquant.uni-heidelberg.de; kathleen.boerner@bioquant.uni-heidelberg.de

## 1. List of Materials and instruments for magnetic beads extraction

| Reagent                                | Company           | Material # |
|----------------------------------------|-------------------|------------|
| Guanidinium thiocyanate (GTC)          | Carl Roth         | 0017       |
| Sodium citrate                         | Carl Roth         | 3580       |
| Triton X-100                           | Carl Roth         | 3051       |
| Glycogen (5 µg/µl)                     | Invitrogen        | AM9510     |
| SiMAG-N-DNA magnetic beads (100 µg/µl) | Chemicell         | 1104-5     |
| Nuclease-free water                    | Life Technologies | AM9938     |
| Ethanol abs.                           | Sigma-Aldrich     | 32205      |
| Diethyl pyrocarbonate (DEPC)           | Sigma-Aldrich     | D5758      |
| Dithiothreitol (DTT)                   | Carl Roth         | 6908       |

| Consumable                                     | Company            | Material # |
|------------------------------------------------|--------------------|------------|
| Masterblock, 96 well, PP, 0.5 ml, V-bottom     | Greiner            | 786261     |
| twin.tec 96-well PCR Plate, skirted, colorless | Eppendorf          | 951020401  |
| Molded Polypropylene Reservoir for Liquidator  | V&P Scientific     | VP 576D    |
| Pipette Tips LQR LTS 200 µl F 960/10           | Mettler Toledo     | 17010646   |
| Grip-Tips 300 µl long, sterile with filter     | Integra Bioscience | 4485       |

| Equipment                                 | Company                  | Material # |
|-------------------------------------------|--------------------------|------------|
| Magnet Plate for 96-well deep well plates | Magtivio                 | MDMG0013   |
| Liquidator 96 Manual Pipetting System     | Mettler Toledo           | 17010335   |
| Magnetic rack DynaMag™-2 Magnet           | Thermo Fisher Scientific | 12321D     |
| 1.25 ml 8-multichannel dispenser pipette  | Eppendorf                |            |
| Vortexer                                  | IKA                      | MS3        |

## 2. Detailed step-by-step procedure for RNA extraction using magnetic beads

### 2.1 Prepare stock solutions

#### *DEPC-treated water (1000 ml)*

- Add 1 ml DEPC to 1000 ml MilliQ (Merck) purified water
- Shake vigorously
- Autoclave for 15 min at 121 °C to deactivate DEPC
- Store at room temperature

#### *70% Ethanol (1000 ml)*

- Mix 700 ml of EtOH abs. and 300 ml of DEPC-treated water

#### *GTC lysis buffer stock (1000 ml)*

- Dilute in 400 ml DEPC-treated water at room temperature:
  - 590.8 g GTC (5M final conc.)
  - 7.35 g Sodium citrate (25 mM final conc.)
  - 10 ml Triton X-100 (1% final conc.)
  - 20 ml DTT (2M stock) (40 mM final conc.)
- Adjust pH to 8 using NaOH
- Fill up to 1000 ml with DEPC-treated water
- Aliquot and store at 4°C (*Note 1*)

#### *Complete GTC lysis buffers for 1x 96-well plate*

- Just before RNA extraction, prepare complete GTC lysis buffer
- Check that no crystals are present in the GTC lysis buffer stock
- Mix the following components
  - 14.4 ml GTC lysis buffer stock
  - 60 µl Glycogen (20 µg/ml final conc.)
  - 535 µl RT-qPCR internal control (5 µg/sample final conc.)

#### *SiMAG-N-DNA beads dilution for 1x 96-well plate*

- Just before RNA extraction, prepare magnetic bead dilution
- Vortex tube containing magnetic bead stock
- Transfer 1.1 ml magnetic bead stock to a 1.5 ml Eppendorf tube
- Wash magnetic beads with RNase free water (3×)
  - Place on a magnetic rack for 2 min
  - Remove the supernatant
  - Add 1 ml RNase-free water
  - Mix well by vortexing
  - Perform this washing step three times in total
- Prepare magnetic bead dilution in EtOH abs.
  - 19 ml EtOH abs.
  - 1 ml SiMAG-N-DNA (5 µg/µl final conc.)
- Vortex dilution well before use

## 2.2 Perform RNA extraction using magnetic beads

### *Preparation and deactivation of pharyngeal swab patient samples*

1. For each patient sample, prepare one 1.5 ml tube containing 140  $\mu$ l freshly prepared complete GTC lysis buffer
2. Transfer 140  $\mu$ l of the pharyngeal swab patient sample using Grip-Tips (300  $\mu$ l, long) to the previously prepared 1.5 ml tubes containing complete GTC lysis buffer
3. Vortex for 10 sec
4. Briefly spin and incubate for 10 min at room temperature
5. Transfer lysates (280  $\mu$ l) of all patient samples into a 0.5 ml 96 deep-well plate

### *RNA binding to magnetic beads*

1. Vortex freshly prepared magnetic beads dilution
2. Add 200  $\mu$ l of magnetic beads using a multichannel pipette into each well of the 96 deep-well plate containing the lysates. Pipette up and down 10 – 15 $\times$
3. Incubate 96 well plate on a Vortexer for 8 min
4. Resuspend sedimented beads using Liquidator (10 $\times$ )
5. Incubate for an additional 7 min on Vortexer
6. Place the deep-well plate on a magnet plate for 10 min
7. Ring pellets should be formed (Figure 1E)

### *Ethanol washing (3 $\times$ )*

1. Remove supernatant
2. Remove the deep-well plate from the magnet plate
3. Add 200  $\mu$ l 70% EtOH to each well using Liquidator
4. Resuspend (10 $\times$ ) sedimented beads using Liquidator
5. Check that a brownish suspension is formed (Figure 1B)
6. Place deep-well on magnet plate
7. Incubate until ring pellets are formed (ring pellets will form quickly at this step, approx. 1 min)
8. Perform this washing step three times

### *Water washing*

1. Remove supernatant using Liquidator
2. Carefully rinse the ring pellets with 60  $\mu$ l of RNase-free water using Liquidator while keeping the deep-well plate on the magnet plate (*Note 2*)
3. Discard the 60  $\mu$ l of RNase-free water and immediately proceed to the elution step

### *RNA Elution*

1. Remove the plate from the magnet plate
2. Add 60  $\mu$ l of RNase-free water to each well using Liquidator
3. Resuspend (10 $\times$ ) sedimented beads using Liquidator
4. Inspect the plate: all pellets should be resuspended, if not use a 200  $\mu$ l pipet to resuspend the pellet in individual wells
5. Place the deep-well plate on Vortexer for 5 – 10 min
6. Place deep-well plate on magnet plate
7. Incubate until ring pellets are formed (ring pellets will form quickly at this step, approx. 1 min)
8. Transfer 55  $\mu$ l of the eluate to new 96 well PCR plate using Liquidator
9. Place the 96 well PCR plate on magnet plate

10. Incubate until ring pellets are formed (ring pellets will form quickly at this step, approx. 1 min)
11. To remove any residual beads, transfer 50 µl of the eluate to new 96 well PCR plate using Liquidator

*Note 1. Crystals may form in the buffer after a prolonged storage at 4°C.*

*Note 2. This step assures that all residual ethanol is removed and will not interfere with qPCR, some beads and RNA might be lost.*

**Supplementary Table S1.** Specificity and sensitivity of qPCR as a pool of 3 independent magnetic bead RNA extractions. To determine specificity and sensitivity QIAcube qPCR was used as a reference; CI = confidence intervals.

| CT range           | 40-35    | 35-30     | 30-25     | 25-0      |
|--------------------|----------|-----------|-----------|-----------|
| True positive      | 7        | 24        | 26        | 25        |
| True negative      | 73       | 73        | 73        | 73        |
| False positive     | 3        | 3         | 3         | 3         |
| False negative     | 6        | 0         | 0         | 0         |
| Sensitivity        | 54%      | 100%      | 100%      | 100%      |
| Specificity        | 96%      | 96%       | 96%       | 96%       |
| Sensitivity 95% CI | 25 – 81% | 86 – 100% | 87 – 100% | 86 – 100% |
| Specificity 95% CI | 89 - 99% | 89 - 99%  | 89 - 99%  | 89 - 99%  |

**Supplementary Table S2.** Sensitivity and specificity of colorimetric RT-LAMP after magnetic bead RNA extractions. To determine sensitivity and specificity QIAcube qPCR was used as a reference; CI = confidence intervals.

| CT range           | 40-35     | 35-30     | 30-25     | 25-0      |
|--------------------|-----------|-----------|-----------|-----------|
| True positive      | 0         | 4         | 14        | 15        |
| True negative      | 29        | 29        | 29        | 29        |
| False positive     | 0         | 0         | 0         | 0         |
| False negative     | 6         | 12        | 1         | 0         |
| Sensitivity        | 0%        | 25%       | 93%       | 100%      |
| Specificity        | 100%      | 100%      | 100%      | 100%      |
| Sensitivity 95% CI | 0 – 46%   | 7 – 52%   | 68 – 100% | 78 – 100% |
| Specificity 95% CI | 88 – 100% | 88 – 100% | 88 – 100% | 88 – 100% |

**Supplementary Table S3.** Sensitivity and specificity of fluorescent RT-LAMP after magnetic bead RNA extractions. To determine sensitivity and specificity QIAcube qPCR was used as a reference; CI = confidence intervals.

| CT range           | 40-35     | 35-30     | 30-25     | 25-0      |
|--------------------|-----------|-----------|-----------|-----------|
| True positive      | 0         | 11        | 15        | 15        |
| True negative      | 29        | 29        | 29        | 29        |
| False positive     | 0         | 0         | 0         | 0         |
| False negative     | 6         | 5         | 0         | 0         |
| Sensitivity        | 0%        | 69%       | 100%      | 100%      |
| Specificity        | 100%      | 100%      | 100%      | 100%      |
| Sensitivity 95% CI | 0 – 46%   | 41 – 89%  | 78 – 100% | 78 – 100% |
| Specificity 95% CI | 88 – 100% | 88 – 100% | 88 – 100% | 88 – 100% |
